# Supplementary material
Source: publisher figshare collection journal article supplement (https://acs.figshare.com/ndownloader/files/10991201)
Supplement: Supplementary file 1 [file 10991201]

## Supporting Information for

### From Live Cells to *C. elegans*: Selective Staining and Quantification of Lipid Structures Using a Fluorescent Hybrid Benzothiadiazole Derivative

Alberto A. R. Mota,<sup>a</sup> Jose R. Correa,<sup>a</sup> Lorena P. de Andrade,<sup>a</sup> José A. F. de Assumpção,<sup>a</sup>

Giovana A. de Souza Cintra,<sup>b</sup> Lucio H. Freitas-Junior,<sup>b</sup>

Wender A. da Silva,<sup>a</sup> Heibbe C. B. de Oliveira,<sup>a</sup> and Brenno A. D. Neto,<sup>a\*</sup>

<sup>a</sup> Laboratory of Medicinal and Technological Chemistry, University of Brasília (IQ-UnB). Campus Universitário Darcy Ribeiro, CEP 70904970, P.O.Box 4478, Brasília-DF, Brazil; E-mail: brenno.ipi@gmail.com

<sup>b</sup> Departamento de Microbiologia, Instituto de Ciências Biomédicas, Universidade de São Paulo (USP), 05508-900, São Paulo, SP, Brasil.

Figure S1 \_\_\_\_\_ Page S2

Figure S2 \_\_\_\_\_ Page S2

Figure S3 \_\_\_\_\_ Page S3

Figure S4 \_\_\_\_\_ Page S3

Figure S5 \_\_\_\_\_ Page S4

Figure S6 \_\_\_\_\_ Page S4

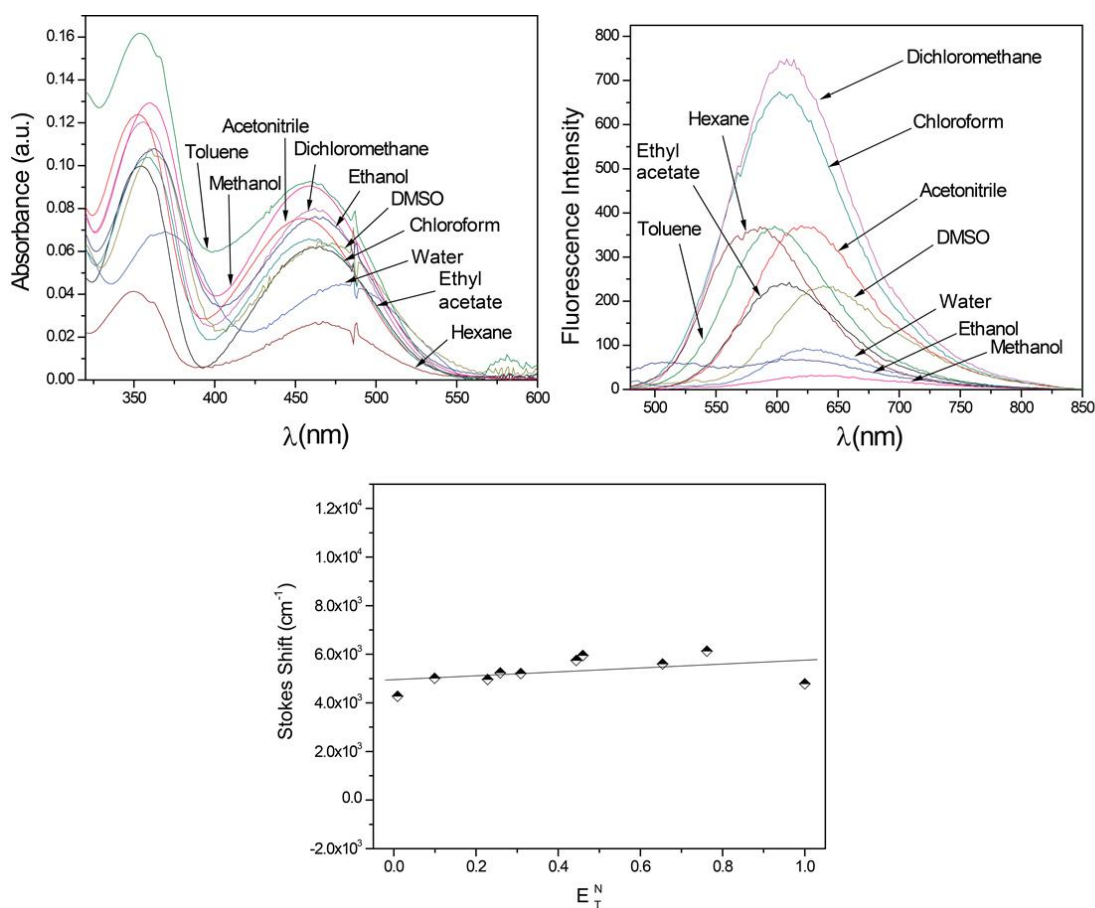

**Figure S1.** UV-Vis, fluorescent emission and Stokes shift ( $\text{cm}^{-1}$ ) vs.  $E_T^N$  values for the tested solvents of the new fluorescent **BTD-Lip**. 10  $\mu\text{M}$  concentration for all analyses.

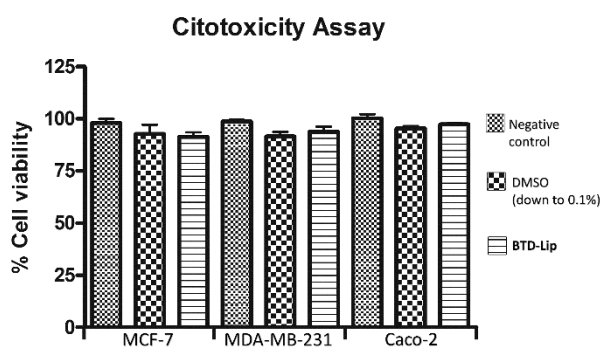

**Figure S2.** Cell viability assays. No statistically significant cytotoxic effect in the samples incubated with **BTD-Lip** (24 hours) was noted. The incubation in the presence of DMSO (down to 0.1%) was used as a positive control due to its already known cytotoxic effect with concentration dependence. Samples maintained only in the culture medium were used as negative control.

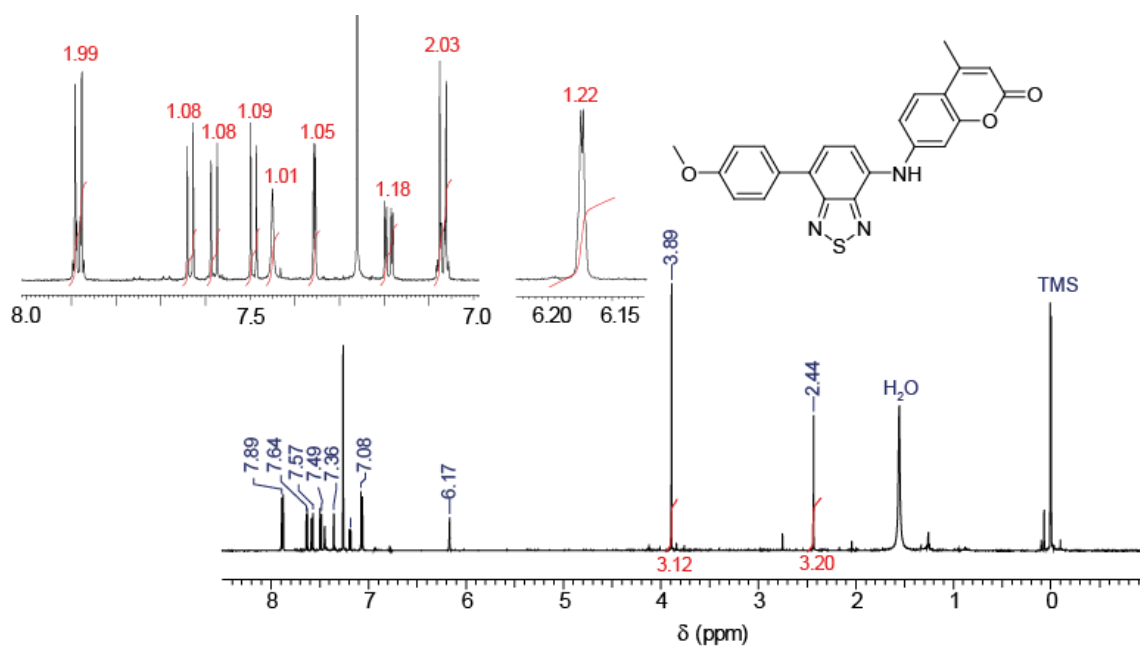

Figure S3. <sup>1</sup>H NMR (CDCl<sub>3</sub>, 600 MHz) of BTD-Lip.

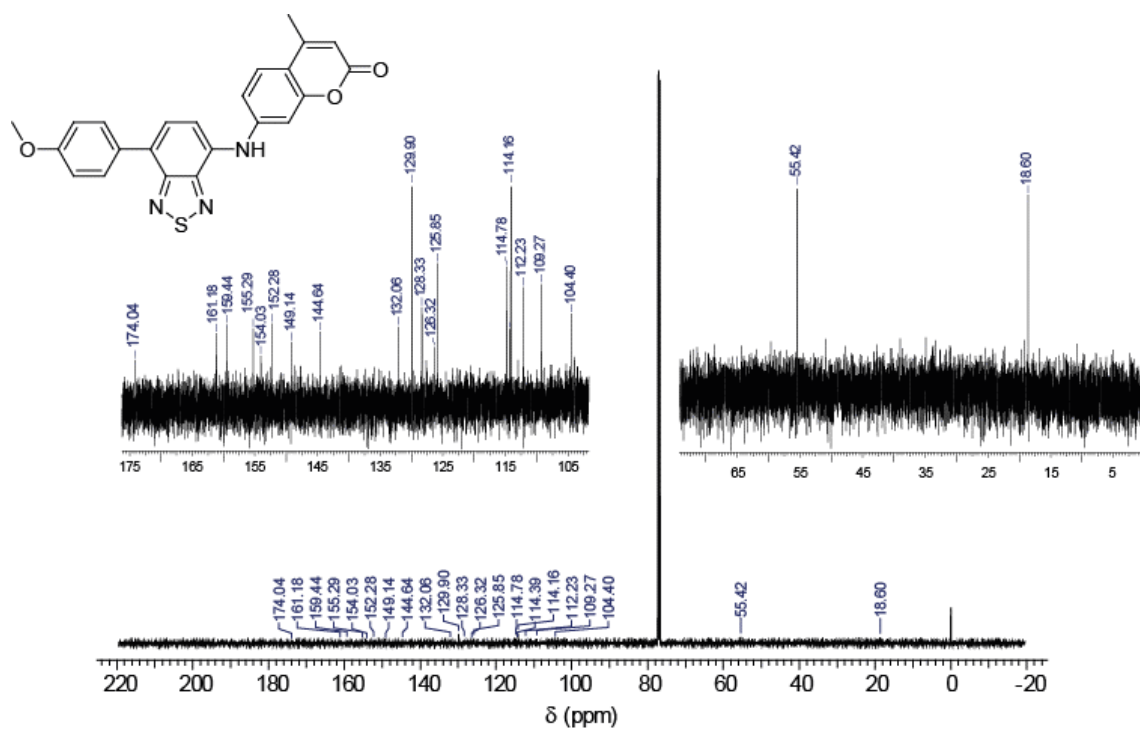

Figure S4. <sup>13</sup>C NMR (CDCl<sub>3</sub>, 150 MHz) of BTD-Lip.

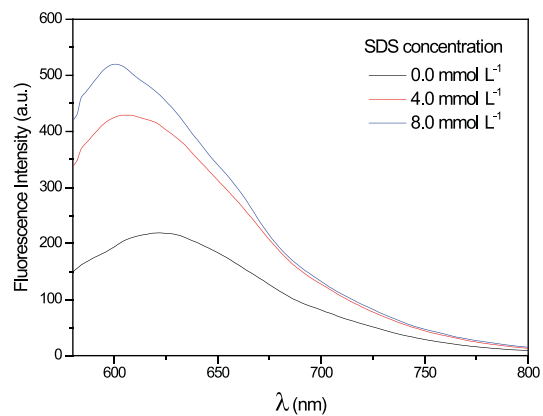

**Figure S5.** Fluorescence intensity of **BTD-Lip** (10 μM) below and above the critical micellar concentration of SDS.

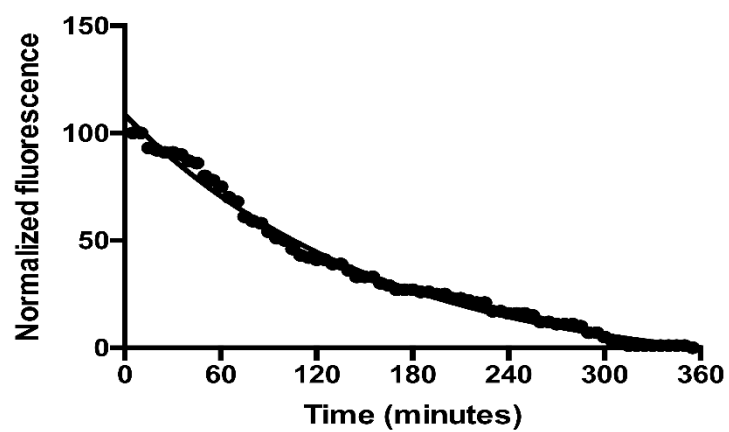

**Figure S6.** Photostability assay.
